# Supplementary material for: Role of Autotaxin in High Glucose-Induced Human ARPE-19 Cells
Source: MDPI journal article supplement (doi:10.3390/ijms23169181), 2022-08-16
Supplement: s1 [file s1]

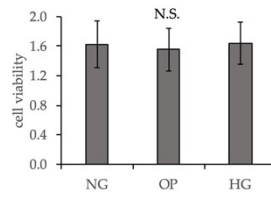

Figure S1. Cell viability assay results were not significantly different among the NG, OP, and HG groups. N.S. means statistically not significant.

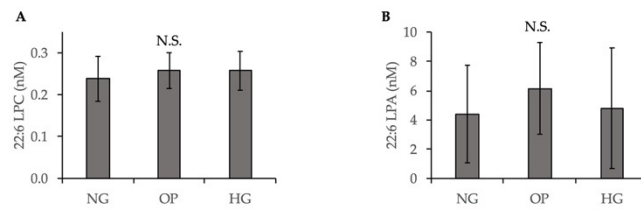

Figure S2. The LPC level 22:6 (A) and the LPA level 22:6 (B) did not differ significantly between the NG and HG groups.

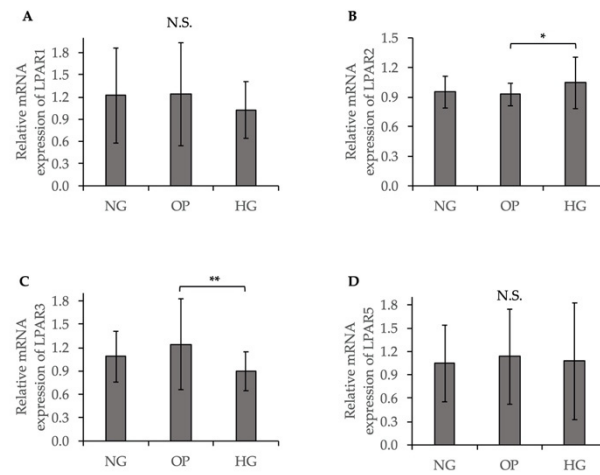

Figure S3. LPAR expression induced by HG in ARPE-19 cells. qRT-PCR quantification of (A) LPAR1, (B) LPAR2, (C) LPAR3, and (D) LPAR5 mRNA expression levels relative to that of GAPDH. \*  $p < 0.05$  and \*\*  $p < 0.01$  (ANOVA followed by Tukey's multiple comparison test).

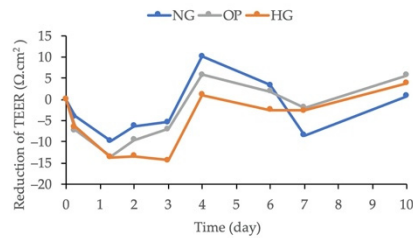

Figure S4. Changes in TEER value at 6, 32, 48, and 72 h and at 4, 6, 7, and 10 days after treatment with NG, OP, and HG media.

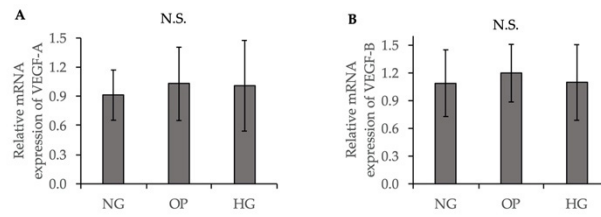

Figure S5. Effects of HG on VEGF expression in ARPE-19 cells. (A) qRT-PCR quantification of (A) VEGF-A and (B) VEGF-B mRNA expression levels relative to that of GAPDH.

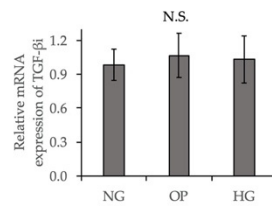

Figure S6. TGF- $\beta$ i expression induced by HG in ARPE-19 cells. qRT-PCR quantification of TGF- $\beta$ i mRNA expression relative to that of GAPDH.

Table S1. Primer sequences used for qRT-PCR.

| Primers        | Forward 5'-3'        | Reverse 5'-3'             |
|----------------|----------------------|---------------------------|
| GAPDH          | AATCCATGGCACCGTCAAG  | ATCGCCCCACTTGATTTTGG      |
| ATX            | ACAACGAGGAGAGCTGCAAT | AGAAGTCCAGGCTGGTGAGA      |
| COL1A1         | CAGCCGCTTCACCTACAGC  | TTTTGTATTCAATCACTGTCTTGCC |
| $\alpha$ -SMA  | TTGTCCACCGCAAATGCTTC | AGGTAACGAGTCAGAGCTTTGG    |
| VEGF-A         | TTCTGCTGTCTTGGGTGCAT | ATTCTGCCCTCCTCCTTCTG      |
| VEGF-B         | CAGTGCTGTGAAGCCAGACA | GGAGTGGGATGGGTGATGT       |
| VEGFR-1        | ACTCCCACACTAGGCACAC  | TGAGAAGTAGGCATCTGTACTG    |
| VEGFR-2        | ACAGCCTTTTGTGTCAGTGC | TTCAGGCACCTATGCCTGCAC     |
| TGF- $\beta$ 1 | CCCAGCATCTGCAAAGCTC  | GTCAATGTACAGCTGCCGCA      |
| TGF- $\beta$ 2 | TGCCGCCCTTCTTCCCCTC  | GGAGCACAAGCTGCCCCTGA      |
| TGF- $\beta$ 3 | GGTTTTCCGCTTCAATGTGT | TATAGCGCTGTTTGGCAATG      |
| TGF- $\beta$ i | GTCCACAGCCATTGACCTTT | GAGTTTCCAGGGTCTGTCCA      |
